# Supplementary material for: Genome-Wide Identification, Evolutionary, and Expression Analyses of Histone H3 Variants in Plants
Source: Hindawi journal article supplement (doi:10.1155/2015/341598), 2015-01-01

A

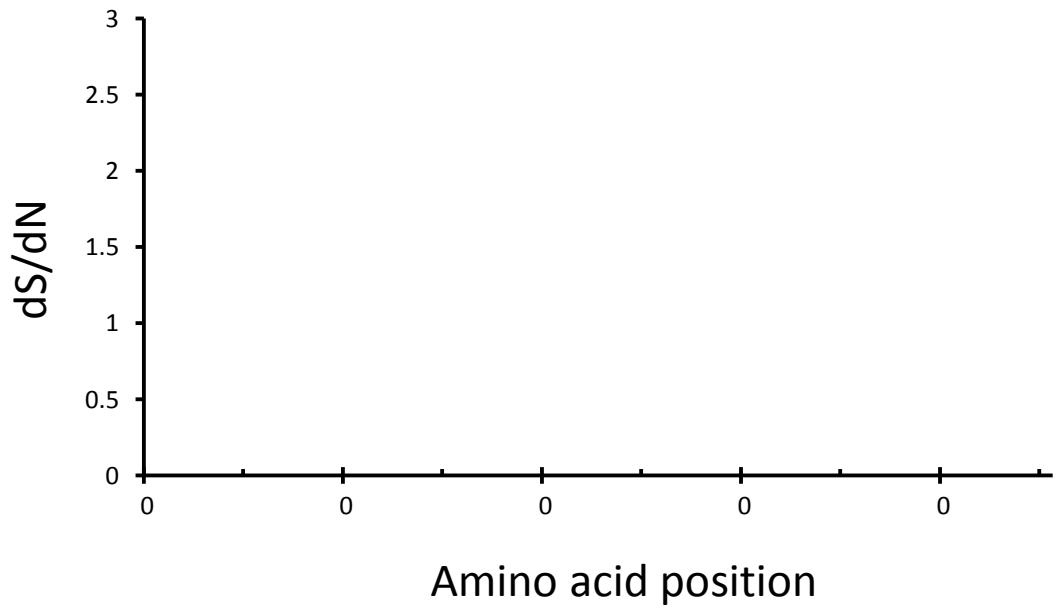

B

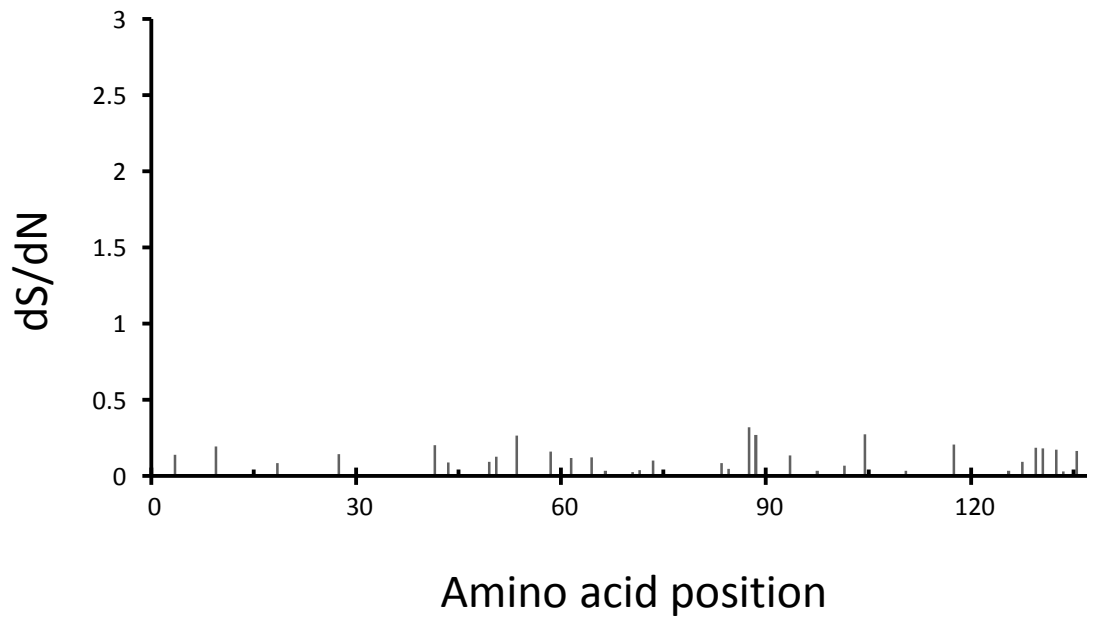

Supplement: f2 [file 341598.f2.pdf]
