# Supplementary material for: Genome-Wide Identification, Evolutionary, and Expression Analyses of Histone H3 Variants in Plants
Source: Biomed Res Int. 2015 Feb 26;2015:341598. doi: 10.1155/2015/341598 (PMC4357034; doi:10.1155/2015/341598)
Supplement: Supplementary file 1 — Supplementary Figure 1: Alignment of Arabidopsis thaliana and Capsella rubella HTR proteins. Capsella rubella HTRs have several conserved deletions. The H3.1 or H3.1 signature are absent in Capsella rubella HTR proteins. Supplementary Figure 2: Analysis of site-specific levels of selection pressure in H3.3 (A) and H3.1(B) proteins. Most of the residues were under significant negative selection (P< 12 0.05) and several sites under relaxed constrain(A). The x-axis numbers correspond to the numbering of the amino acids in the Arabidopsis thaliana H3.3 (A) and H3.1(B). The y-axis values are the ratio of dN/dS. Supplementary Table: Accession numbers of HTR genes used in this study. [file 341598.f1.xlsx]

## Sheet: Sheet1
H3.3	A.thaliana	AT4G40040	-	-	-	-	-	-	-	-	-	-	-	-	-	-	-	-	-	-	-	-	-	-	-	-	-	-	M	A	R	T	K	Q	T	A	R	K	S	T	G	G	K	A	P	R	K	Q	L
H3.3	A.thaliana	AT5G10980	-	-	-	-	-	-	-	-	-	-	-	-	-	-	-	-	-	-	-	-	-	-	-	-	-	-	M	A	R	T	K	Q	T	A	R	K	S	T	G	G	K	A	P	R	K	Q	L
H3.1	A.thaliana	AT5G65360	-	-	-	-	-	-	-	-	-	-	-	-	-	-	-	-	-	-	-	-	-	-	-	-	-	-	M	A	R	T	K	Q	T	A	R	K	S	T	G	G	K	A	P	R	K	Q	L
H3.1	A.thaliana	AT5G10390	-	-	-	-	-	-	-	-	-	-	-	-	-	-	-	-	-	-	-	-	-	-	-	-	-	-	M	A	R	T	K	Q	T	A	R	K	S	T	G	G	K	A	P	R	K	Q	L
H3.1	A.thaliana	AT1G09200	-	-	-	-	-	-	-	-	-	-	-	-	-	-	-	-	-	-	-	-	-	-	-	-	-	-	M	A	R	T	K	Q	T	A	R	K	S	T	G	G	K	A	P	R	K	Q	L
H3.1	A.thaliana	AT3G27360	-	-	-	-	-	-	-	-	-	-	-	-	-	-	-	-	-	-	-	-	-	-	-	-	-	-	M	A	R	T	K	Q	T	A	R	K	S	T	G	G	K	A	P	R	K	Q	L
H3.1	A.thaliana	AT5G10400	-	-	-	-	-	-	-	-	-	-	-	-	-	-	-	-	-	-	-	-	-	-	-	-	-	-	M	A	R	T	K	Q	T	A	R	K	S	T	G	G	K	A	P	R	K	Q	L
H3-like	C.rubella	Carubv10002094m	T	Y	Y	S	H	T	T	Y	S	N	K	K	K	H	K	S	S	C	I	S	R	S	R	V	K	T	M	A	R	T	K	-	T	A	R	K	S	T	G	G	K	A	R	K	-	-	-
H3-like	C.rubella	Carubv10021126m	-	-	-	-	-	-	-	-	-	-	-	-	-	-	-	-	-	-	-	-	-	-	-	-	-	-	M	A	R	T	K	-	T	A	R	K	S	T	G	G	K	A	R	K	-	-	-
H3-like	C.rubella	Carubv10005990m	-	-	-	-	-	-	-	-	-	-	-	-	-	-	-	-	-	-	-	-	-	-	-	-	-	-	M	A	R	T	K	-	T	A	R	K	S	T	G	G	K	A	R	K	-	-	-
H3-like	C.rubella	Carubv10005986m	-	-	-	-	-	-	-	-	-	-	-	-	-	-	-	-	-	-	-	-	-	-	-	-	-	-	M	A	R	T	K	-	T	A	R	K	S	T	G	G	K	A	R	K	-	-	-
H3-like	C.rubella	Carubv10011755m	-	-	-	-	-	-	-	-	-	-	-	-	-	-	-	-	-	-	-	-	-	-	-	-	-	-	M	A	R	T	K	-	T	A	R	K	S	T	G	G	K	A	R	K	-	-	-
H3-like	C.rubella	Carubv10003405m	-	-	-	-	-	-	-	-	-	-	-	-	-	-	-	-	-	-	-	-	-	-	-	-	-	-	M	A	R	T	K	-	T	A	R	K	S	T	G	G	K	A	R	K	-	-	-
H3-like	C.rubella	Carubv10018763m	-	-	-	-	-	-	-	-	-	-	-	-	-	-	-	-	-	-	-	-	-	-	-	-	-	-	M	A	R	T	K	-	T	A	R	K	S	T	G	G	K	A	R	K	-	-	-
H3-like	C.rubella	Carubv10002544m	-	-	-	-	-	-	-	-	-	-	-	-	-	-	-	-	-	-	-	-	-	-	-	-	-	-	M	A	R	T	K	-	T	A	R	K	S	T	G	G	K	A	R	K	-	-	-
H3-like	C.rubella	Carubv10021660m	S	T	S	S	S	S	S	N	S	S	K	I	K	T	S	S	R	I	Y	S	K	-	-	-	-	-	M	A	R	T	K	-	T	A	R	K	S	T	G	G	K	A	R	K	-	-	-
H3-like	C.rubella	Carubv10010862m	-	-	-	-	-	-	-	-	-	-	-	-	-	-	-	-	-	-	-	-	-	-	-	-	-	-	M	A	R	T	K	-	T	A	R	K	S	T	G	G	K	G	R	K	-	-	-
H3-like	C.rubella	Carubv10010652m	-	-	-	-	-	-	-	-	-	-	-	-	-	-	-	-	-	-	-	-	-	-	-	-	-	-	M	A	R	K	K	-	K	A	R	K	S	T	G	G	N	A	N	K	-	-	-
H3.3	A.thaliana	AT4G40040	R	E	I	R	K	Y	Q	K	S	-	T	E	L	L	I	R	K	L	P	F	Q	R	L	V	R	E	I	A	Q	D	F	K	T	D	L	R	F	Q	S	H	A	V	L	A	L	Q	E
H3.3	A.thaliana	AT5G10980	R	E	I	R	K	Y	Q	K	S	-	T	E	L	L	I	R	K	L	P	F	Q	R	L	V	R	E	I	A	Q	D	F	K	T	D	L	R	F	Q	S	H	A	V	L	A	L	Q	E
H3.1	A.thaliana	AT5G65360	R	E	I	R	K	Y	Q	K	S	-	T	E	L	L	I	R	K	L	P	F	Q	R	L	V	R	E	I	A	Q	D	F	K	T	D	L	R	F	Q	S	S	A	V	A	A	L	Q	E
H3.1	A.thaliana	AT5G10390	R	E	I	R	K	Y	Q	K	S	-	T	E	L	L	I	R	K	L	P	F	Q	R	L	V	R	E	I	A	Q	D	F	K	T	D	L	R	F	Q	S	S	A	V	A	A	L	Q	E
H3.1	A.thaliana	AT1G09200	R	E	I	R	K	Y	Q	K	S	-	T	E	L	L	I	R	K	L	P	F	Q	R	L	V	R	E	I	A	Q	D	F	K	T	D	L	R	F	Q	S	S	A	V	A	A	L	Q	E
H3.1	A.thaliana	AT3G27360	R	E	I	R	K	Y	Q	K	S	-	T	E	L	L	I	R	K	L	P	F	Q	R	L	V	R	E	I	A	Q	D	F	K	T	D	L	R	F	Q	S	S	A	V	A	A	L	Q	E
H3.1	A.thaliana	AT5G10400	R	E	I	R	K	Y	Q	K	S	-	T	E	L	L	I	R	K	L	P	F	Q	R	L	V	R	E	I	A	Q	D	F	K	T	D	L	R	F	Q	S	S	A	V	A	A	L	Q	E
H3-like	C.rubella	Carubv10002094m	-	R	I	R	K	Y	K	S	T	-	I	R	K	R	V	R	-	-	-	-	-	-	-	-	-	-	I	A	D	-	-	K	T	D	-	-	-	R	S	H	A	V	-	-	-	-	-
H3-like	C.rubella	Carubv10021126m	-	R	I	R	K	Y	K	S	T	-	I	R	K	R	V	R	-	-	-	-	-	-	-	-	-	-	I	A	D	-	-	K	T	D	-	-	-	R	S	H	A	V	-	-	-	-	-
H3-like	C.rubella	Carubv10005990m	-	R	I	R	K	Y	K	S	T	-	I	R	K	R	V	R	-	-	-	-	-	-	-	-	-	-	I	A	D	-	-	K	T	D	-	-	-	R	S	H	A	V	-	-	-	-	-
H3-like	C.rubella	Carubv10005986m	-	R	I	R	K	Y	K	S	T	-	I	R	K	R	V	R	-	-	-	-	-	-	-	-	-	-	I	A	D	-	-	K	T	D	-	-	-	R	S	H	A	V	-	-	-	-	-
H3-like	C.rubella	Carubv10011755m	-	R	I	R	K	Y	K	S	T	-	I	R	K	R	V	R	-	-	-	-	-	-	-	-	-	-	I	A	D	-	-	K	T	D	-	-	-	R	S	S	A	V	A	-	-	-	-
H3-like	C.rubella	Carubv10003405m	-	R	I	R	K	Y	K	S	T	-	I	R	K	R	V	R	-	-	-	-	-	-	-	-	-	-	I	A	D	-	-	K	T	D	-	-	-	R	S	S	A	V	A	-	-	-	-
H3-like	C.rubella	Carubv10018763m	-	R	I	R	K	Y	K	S	T	-	I	R	K	R	V	R	-	-	-	-	-	-	-	-	-	-	I	A	D	-	-	K	T	D	-	-	-	R	S	S	A	V	A	-	-	-	-
H3-like	C.rubella	Carubv10002544m	-	R	I	R	K	Y	K	S	T	-	I	R	K	R	V	R	-	-	-	-	-	-	-	-	-	-	I	A	D	-	-	K	T	D	-	-	-	R	S	S	A	V	A	-	-	-	-
H3-like	C.rubella	Carubv10021660m	-	R	I	R	K	Y	K	S	T	-	I	R	K	R	V	R	-	-	-	-	-	-	-	-	-	-	I	A	D	-	-	K	T	D	-	-	-	R	S	S	A	V	A	-	-	-	-
H3-like	C.rubella	Carubv10010862m	-	R	I	R	K	Y	K	S	T	D	I	R	K	R	V	R	-	-	-	-	-	-	-	-	-	-	I	S	D	-	Y	K	V	D	-	-	-	R	S	H	A	I	-	-	-	-	-
H3-like	C.rubella	Carubv10010652m	-	R	V	R	K	Y	K	-	-	-	-	-	-	R	I	R	-	-	-	-	-	-	-	-	-	-	-	-	-	-	-	K	A	D	-	-	-	K	I	T	C	V	-	-	-	-	-
[truncated: 42 more columns]
