# Supplementary material for: Genome-Wide Identification, Evolutionary, and Expression Analyses of Histone H3 Variants in Plants
Source: Biomed Res Int. 2015 Feb 26;2015:341598. doi: 10.1155/2015/341598 (PMC4357034; doi:10.1155/2015/341598)
Supplement: Supplementary file 3 [file 341598.f3.xlsx]

## Sheet: Sheet1
Supplementary table: Accession number of HTRs
JGI ID	Organism	Intron			H3 type	AA length	CDS length	Amino acid position
		5-UTR	CDS	3-UTR				4	9	27	36	31	41	87	90
AT1G01370	Arabidopsis thaliana	N	Y	N	CenH3	178	537	K	S	R	R	T	Y	E	V
AT1G09200	Arabidopsis thaliana	N	N	N	H3.1	136	411	K	K	K	K	A	F	S	A
AT3G27360	Arabidopsis thaliana	N	N	N	H3.1	136	411	K	K	K	K	A	F	S	A
AT5G10390	Arabidopsis thaliana	N	N	N	H3.1	136	411	K	K	K	K	A	F	S	A
AT5G10400	Arabidopsis thaliana	N	N	N	H3.1	136	411	K	K	K	K	A	F	S	A
AT5G65360	Arabidopsis thaliana	N	N	N	H3.1	136	411	K	K	K	K	A	F	S	A
AT4G40030	Arabidopsis thaliana	N	Y	N	H3.3	164	495	K	K	K	K	T	Y	H	L
AT4G40040	Arabidopsis thaliana	Y	Y	N	H3.3	136	411	K	K	K	K	T	Y	H	L
AT5G10980	Arabidopsis thaliana	N	Y	N	H3.3	136	411	K	K	K	K	T	Y	H	L
AT1G13370	Arabidopsis thaliana	N	Y	N	H3-like	136	411	K	K	K	K	T	F	H	L
AT1G19890	Arabidopsis thaliana	N	Y	N	H3-like	137	414	K	K	K	K	Y	F	H	L
AT1G75600	Arabidopsis thaliana	N	Y	N	H3-like	136	411	K	K	K	K	T	Y	H	L
AT1G75610	Arabidopsis thaliana	N	Y	N	H3-like	115	348	-	-	K	K	T	Y	H	L
AT5G12910	Arabidopsis thaliana	N	N	N	H3-like	131	396	N	K	H	K	P	Y	G	S
AT5G65350	Arabidopsis thaliana	N	N	N	H3-like	139	420	K	I	Q	K	A	F	S	A
Carubv10010436m	capsella rubella	Y	Y	N	cenH3	177	534	K	R	S	K	T	Y	A	-
Carubv10002094m	capsella rubella	N	Y	N	H3-like	175	528	K	K	K	K	T	Y	V	-
Carubv10002544m	capsella rubella	N	N	N	H3-like	136	411	K	K	K	K	A	-	V	-
Carubv10003405m	capsella rubella	N	N	N	H3-like	136	411	K	K	K	K	A	-	V	-
Carubv10005986m	capsella rubella	Y	Y	N	H3-like	136	411	K	K	K	K	T	Y	V	-
Carubv10005990m	capsella rubella	Y	Y	N	H3-like	136	411	K	K	K	K	T	Y	V	-
Carubv10010652m	capsella rubella	N	Y	N	H3-like	125	378	K	K	D	K	A	H	-	-
Carubv10010862m	capsella rubella	N	Y	N	H3-like	137	414	K	K	K	K	Y	-	I	-
Carubv10011755m	capsella rubella	N	N	N	H3-like	136	411	K	K	K	K	A	-	V	-
Carubv10018763m	capsella rubella	N	N	N	H3-like	136	411	K	K	K	K	A	-	V	-
Carubv10021126m	capsella rubella	N	Y	N	H3-like	136	411	K	K	K	K	T	Y	V	-
Carubv10021660m	capsella rubella	N	N	N	H3-like	169	510	K	K	K	K	A	-	V	-
Cre02.g104800	Chlamydomonas reinhardtii	N	Y	N	CenH3	232	699	K	P	S	K	A	Y	E	L
Cre16.g661450	Chlamydomonas reinhardtii	N	Y	N	CenH3	156	471	K	P	S	K	P	Y	E	L
Cre06.g265500	Chlamydomonas reinhardtii	N	N	N	H3.1A	135	408	K	K	K	K	A	Y	Q	L
Cre06.g266650	Chlamydomonas reinhardtii	N	N	N	H3.1A	135	408	K	K	K	K	A	Y	Q	L
Cre06.g267950	Chlamydomonas reinhardtii	N	N	N	H3.1A	135	408	K	K	K	K	A	Y	Q	L
Cre06.g268350	Chlamydomonas reinhardtii	N	N	N	H3.1A	135	408	K	K	K	K	A	Y	Q	L
Cre06.g271250	Chlamydomonas reinhardtii	N	N	N	H3.1A	135	408	K	K	K	K	A	Y	Q	L
Cre06.g274000	Chlamydomonas reinhardtii	N	N	N	H3.1A	135	408	K	K	K	K	A	Y	Q	L
Cre06.g274350	Chlamydomonas reinhardtii	N	N	N	H3.1A	135	408	K	K	K	K	A	Y	Q	L
Cre06.g274850	Chlamydomonas reinhardtii	N	N	N	H3.1A	135	408	K	K	K	K	A	Y	Q	L
Cre06.g275750	Chlamydomonas reinhardtii	N	N	N	H3.1A	135	408	K	K	K	K	A	Y	Q	L
Cre06.g276850	Chlamydomonas reinhardtii	N	N	N	H3.1A	135	408	K	K	K	K	A	Y	Q	L
Cre12.g504650	Chlamydomonas reinhardtii	N	N	N	H3.1A	135	408	K	K	K	K	A	Y	Q	L
Cre12.g504800	Chlamydomonas reinhardtii	N	N	N	H3.1A	135	408	K	K	K	K	A	Y	Q	L
Cre12.g505500	Chlamydomonas reinhardtii	N	N	N	H3.1A	135	408	K	K	K	K	A	Y	Q	L
Cre12.g506300	Chlamydomonas reinhardtii	N	N	N	H3.1A	135	408	K	K	K	K	A	Y	Q	L
Cre13.g569950	Chlamydomonas reinhardtii	N	N	N	H3.1A	135	408	K	K	K	K	A	Y	Q	L
Cre16.g648500	Chlamydomonas reinhardtii	N	N	N	H3.1A	135	408	K	K	K	K	A	Y	Q	L
Cre16.g649900	Chlamydomonas reinhardtii	N	N	N	H3.1A	135	408	K	K	K	K	A	Y	Q	L
Cre16.g650300	Chlamydomonas reinhardtii	N	N	N	H3.1A	135	408	K	K	K	K	A	Y	Q	L
Cre17.g708150	Chlamydomonas reinhardtii	N	N	N	H3.1A	135	408	K	K	K	K	A	Y	Q	L
Cre17.g709050	Chlamydomonas reinhardtii	N	N	N	H3.1A	135	408	K	K	K	K	A	Y	Q	L
Cre17.g710550	Chlamydomonas reinhardtii	N	N	N	H3.1A	135	408	K	K	K	K	A	Y	Q	L
Cre17.g711850	Chlamydomonas reinhardtii	N	N	N	H3.1A	135	408	K	K	K	K	A	Y	Q	L
Cre17.g713550	Chlamydomonas reinhardtii	N	N	N	H3.1A	135	408	K	K	K	K	A	Y	Q	L
Cre17.g713950	Chlamydomonas reinhardtii	N	N	N	H3.1A	135	408	K	K	K	K	A	Y	Q	L
Cre17.g714650	Chlamydomonas reinhardtii	N	N	N	H3.1A	135	408	K	K	K	K	A	Y	Q	L
g12439	Chlamydomonas reinhardtii	N	N	N	H3.1A	135	408	K	K	K	K	A	Y	Q	L
g17169	Chlamydomonas reinhardtii	N	N	N	H3.1A	135	408	K	K	K	K	A	Y	Q	L
g5945	Chlamydomonas reinhardtii	N	N	N	H3.1A	135	408	K	K	K	K	A	Y	Q	L
g5957	Chlamydomonas reinhardtii	N	N	N	H3.1A	135	408	K	K	K	K	A	Y	Q	L
g6148	Chlamydomonas reinhardtii	N	N	N	H3.1A	135	408	K	K	K	K	A	Y	Q	L
g6200	Chlamydomonas reinhardtii	N	N	N	H3.1A	135	408	K	K	K	K	A	Y	Q	L
Cre03.g197050	Chlamydomonas reinhardtii	N	Y	N	H3-like	202	609	K	Q	K	K	R	V	D	E
Cre06.g265000	Chlamydomonas reinhardtii	N	Y	N	H3-like	192	579	K	K	K	K	A	Y	Q	L
Glyma07g06310	glycine max	N	Y	N	CenH3	192	579	K	K	Q	K	E	N	E	V
Glyma16g0295	glycine max	N	Y	N	CenH3	109	330	K	K	-	K	S	N	E	V
Glyma11g37961	glycine max	N	Y	N	H3.3	224	675	K	K	K	K	T	Y	H	L
Glyma11g37970	glycine max	Y	Y	N	H3.3	136	411	K	K	K	K	T	Y	H	L
Glyma14g40590	glycine max	N	Y	N	H3.3	136	411	K	K	K	K	T	Y	H	L
Glyma18g01861	glycine max	N	Y	N	H3.3	186	561	K	K	K	K	T	Y	H	L
Glyma18g01870	glycine max	Y	Y	N	H3.3	136	411	K	K	K	K	T	Y	H	L
Glyma0021s00410	glycine max	N	N	N	H3-like	135	408	K	K	K	K	A	F	S	S
Glyma03g28885	glycine max	N	N	N	H3-like	138	417	T	K	K	K	A	F	S	S
Glyma05g32200	glycine max	N	N	N	H3-like	136	411	K	K	K	K	A	F	S	S
Glyma05g32210	glycine max	N	N	N	H3-like	136	411	K	K	K	K	A	F	S	S
Glyma07g32360	glycine max	N	N	N	H3-like	136	411	K	K	K	K	A	F	S	S
Glyma08g11385	glycine max	N	Y	N	H3-like	195	588	K	K	K	K	P	F	S	S
Glyma08g24380	glycine max	N	N	N	H3-like	136	411	K	K	K	K	A	F	S	S
Glyma08g26880	glycine max	N	N	N	H3-like	136	411	K	K	K	K	A	F	S	S
Glyma11g13940	glycine max	N	N	N	H3-like	136	411	K	K	K	K	A	F	S	S
Glyma12g05910	glycine max	N	N	N	H3-like	136	411	K	K	K	K	A	F	S	S
Glyma13g24180	glycine max	N	N	N	H3-like	136	411	K	K	K	K	A	F	S	S
Glyma13g41710	glycine max	N	N	Y	H3-like	136	411	K	K	K	K	A	F	S	S
Glyma15g03710	glycine max	N	N	N	H3-like	136	411	K	K	K	K	A	F	S	S
Glyma15g34870	glycine max	N	N	N	H3-like	136	411	K	K	K	K	A	F	S	S
Glyma16g17661	glycine max	N	Y	N	H3-like	106	321	K	A	S	E	T	-	-	-
Glyma17g20333	glycine max	N	N	N	H3-like	138	417	K	K	K	K	A	F	S	S
Glyma17g37480	glycine max	N	Y	N	H3-like	201	606	F	S	N	R	R	S	H	L
Glyma18g50120	glycine max	N	N	N	H3-like	136	411	K	K	K	K	A	F	S	S
Gorai.001G155600	gossypium raimondii	N	Y	N	CenH3	140	423	K	K	-	K	H	-	E	V
Gorai.004G040400	gossypium raimondii	N	N	N	H3.1	136	411	K	K	K	K	A	F	S	A
Gorai.004G277200	gossypium raimondii	N	N	N	H3.1	136	411	K	K	K	K	A	F	S	A
Gorai.009G018200	gossypium raimondii	N	N	N	H3.1	136	411	K	K	K	K	A	F	S	A
Gorai.011G056500	gossypium raimondii	N	N	N	H3.1	136	411	K	K	K	K	A	F	S	A
Gorai.013G250500	gossypium raimondii	N	N	N	H3.1	136	411	K	K	K	K	A	F	S	A
Gorai.003G041300	gossypium raimondii	Y	Y	N	H3.3	136	411	K	K	K	K	T	Y	H	L
Gorai.003G041300	gossypium raimondii	N	Y	N	H3.3	136	411	K	K	K	K	T	Y	H	L
Gorai.005G111200	gossypium raimondii	Y	Y	N	H3.3	136	411	K	K	K	K	T	Y	H	L
Gorai.009G234200	gossypium raimondii	Y	Y	N	H3.3	136	411	K	K	K	K	T	Y	H	L
Gorai.001G041800	gossypium raimondii	N	Y	N	H3-like	208	627	N	F	K	K	A	S	S	T
Gorai.004G277300	gossypium raimondii	N	Y	N	H3-like	193	582	K	K	K	K	A	F	S	A
Gorai.010G165700	gossypium raimondii	N	Y	N	H3-like	139	420	-	-	K	K	T	Y	C	S
Gorai.010G171000	gossypium raimondii	N	Y	N	H3-like	193	582	K	K	K	K	A	F	S	A
Gorai.011G056400	gossypium raimondii	N	Y	N	H3-like	136	411	K	K	K	K	A	F	S	A
Gorai.011G110600	gossypium raimondii	N	Y	N	H3-like	181	546	K	K	K	K	A	F	S	A
Gorai.013G154100	gossypium raimondii	N	Y	N	H3-like	225	678	K	K	K	K	A	F	S	A
93197	Micromonas pusilla RCC299	N	Y	N	CenH3	137	414	L	H	-	R	-	Y	E	L
58772	Micromonas pusilla RCC299	N	N	N	H3.1A	136	411	K	K	K	K	A	Y	S	L
63067	Micromonas pusilla RCC299	N	N	N	H3.1A	136	411	K	K	K	K	A	Y	S	L
86780	Micromonas pusilla RCC299	N	N	N	H3.1A	136	411	K	K	K	K	A	Y	S	L
94116	Micromonas pusilla RCC299	N	N	N	H3.1A	136	411	K	K	K	K	A	Y	S	L
Os05g41080	Oryza sativa	N	Y	N	CenH3	165	498	K	K	S	R	A	F	E	L
Os01g64640	Oryza sativa	N	N	N	H3.1	136	411	K	K	K	K	A	F	S	A
Os04g34240	Oryza sativa	N	N	N	H3.1	274	825	K	K	K	K	A	F	S	A
Os05g36280	Oryza sativa	N	N	N	H3.1	136	411	K	K	K	K	A	F	S	A
Os06g06460	Oryza sativa	N	N	N	H3.1	136	411	K	K	K	K	A	F	S	A
Os06g06510	Oryza sativa	N	N	N	H3.1	136	411	K	K	K	K	A	F	S	A
Os11g05730	Oryza sativa	N	N	N	H3.1	136	411	K	K	K	K	A	F	S	A
Os03g27310	Oryza sativa	N	Y	N	H3.3	136	411	K	K	K	K	T	Y	H	L
Os06g04030	Oryza sativa	N	Y	N	H3.3	136	411	K	K	K	K	T	Y	H	L
Os02g25910	Oryza sativa	N	Y	N	H3-like	211	636	K	K	K	K	F	H	H	L
Os02g25940	Oryza sativa	N	Y	N	H3-like	115	358	-	-	K	K	C	Y	H	L
Os06g06480	Oryza sativa	N	Y	N	H3-like	250	753	K	A	K	K	A	F	S	A
Os12g22650	Oryza sativa	N	N	N	H3-like	136	411	K	K	K	K	M	F	S	A
Os12g22680	Oryza sativa	N	N	N	H3-like	136	411	K	K	K	K	T	F	S	V
29021	Ostreococcus lucimarinus	N	Y	N	CenH3	135	408	L	-	-	K	-	Y	E	L
17380	Ostreococcus lucimarinus	N	N	N	H3.1A	136	411	K	K	K	K	A	Y	S	L
38934	Ostreococcus lucimarinus	N	N	N	H3.1A	136	411	K	K	K	K	A	Y	S	L
32891	Ostreococcus lucimarinus	N	Y	N	H3-like	136	411	K	K	K	K	T	Y	T	L
Pp1s568	Physcomitrella patens	N	Y	N	CenH3	128	387	K	-	S	R	A	W	E	T
Pp1s12	Physcomitrella patens	N	N	N	H3.1A	136	411	K	K	K	K	A	Y	S	L
Pp1s156	Physcomitrella patens	N	N	N	H3.1A	136	411	K	K	K	K	A	Y	S	L
Pp1s16	Physcomitrella patens	N	N	N	H3.1A	136	411	K	K	K	K	A	Y	S	L
Pp1s164	Physcomitrella patens	N	N	N	H3.1A	136	411	K	K	K	K	A	Y	S	L
Pp1s410	Physcomitrella patens	N	N	N	H3.1A	136	411	K	K	K	K	A	Y	S	L
Pp1s540	Physcomitrella patens	N	N	N	H3.1A	136	411	K	K	K	K	A	Y	S	L
Pp1s96	Physcomitrella patens	N	N	N	H3.1A	136	411	K	K	K	K	A	Y	S	L
Pp1s3_367V6	Physcomitrella patens	Y	Y	N	H3.3	136	411	K	K	K	K	T	Y	H	L
Pp1s3_368V6	Physcomitrella patens	Y	Y	N	H3.3	136	411	K	K	K	K	T	Y	H	L
Pp1s1963_1V6	Physcomitrella patens	N	Y	N	H3-like	96	291	-	-	-	-	-	V	H	L
Pp1s26_96V6	Physcomitrella patens	N	Y	N	H3-like	141	426	E	-	K	K	A	S	S	L
Pp1s275_13V6	Physcomitrella patens	N	Y	N	H3-like	133	402	K	K	K	K	H	Y	H	L
Pp1s3_594V6	Physcomitrella patens	Y	Y	N	H3-like	136	411	K	K	K	K	A	Y	S	L
Pp1s35_164V6	Physcomitrella patens	N	N	N	H3-like	136	411	K	K	K	K	T	Y	H	L
Pp1s9_383V6	Physcomitrella patens	N	Y	N	H3-like	199	600	K	K	K	K	A	Y	S	L
MA_10432805g0020	Picea abies				H3-like	136	411	K	K	K	K	A	F	S	A
MA_113838g0010	Picea abies				H3-like	136	411	K	K	K	K	A	F	S	A
MA_131523g0020	Picea abies				H3-like	136	411	K	K	K	K	A	F	S	A
MA_17527g0010	Picea abies				H3-like	136	411	K	K	K	K	A	F	S	A
MA_197719g0010	Picea abies				H3-like	136	411	K	K	K	K	A	F	S	S
MA_210354g0010	Picea abies				H3-like	136	411	K	K	K	K	A	F	S	A
MA_230693g0010	Picea abies				H3-like	136	411	K	K	K	K	A	F	S	S
MA_259842g0010	Picea abies				H3-like	136	411	K	K	K	K	T	Y	H	L
MA_350032g0010	Picea abies				H3-like	136	411	K	K	K	K	T	Y	H	L
MA_475294g0010	Picea abies				H3-like	138	417	K	K	K	K	A	F	S	A
MA_56411g0010	Picea abies				H3-like	136	411	K	K	K	K	A	F	S	S
Potri.014G096400	populus trichocarpa	N	Y	N	CenH3	152	459	K	K	R	Q	Q	F	E	V
Potri.001G016900	populus trichocarpa	N	N	N	H3.1	136	411	K	K	K	K	A	F	S	A
Potri.002G028800	populus trichocarpa	N	N	N	H3.1	136	411	K	K	K	K	A	F	S	A
Potri.003G207700	populus trichocarpa	N	N	N	H3.1	136	411	K	K	K	K	A	F	S	A
Potri.003G210100	populus trichocarpa	N	N	N	H3.1	136	411	K	K	K	K	A	F	S	A
Potri.014G096900	populus trichocarpa	N	N	N	H3.1	136	411	K	K	K	K	A	F	S	A
Potri.002G026800	populus trichocarpa	N	Y	Y	H3.3	136	411	K	K	K	K	T	Y	H	L
Potri.002G100200	populus trichocarpa	Y	Y	N	H3.3	136	411	K	K	K	K	T	Y	H	L
Potri.005G072300	populus trichocarpa	Y	Y	Y	H3.3	136	411	K	K	K	K	T	Y	H	L
Potri.005G072300	populus trichocarpa	Y	Y	N	H3.3	136	411	K	K	K	K	T	Y	H	L
Potri.005G235700	populus trichocarpa	N	Y	N	H3.3	136	411	K	K	K	K	T	Y	H	L
Potri.007G014300	populus trichocarpa	Y	Y	N	H3.3	136	411	K	K	K	K	T	Y	H	L
Potri.007G096700	populus trichocarpa	Y	Y	N	H3.3	136	411	K	K	K	K	T	Y	H	L
Potri.001G016700	populus trichocarpa	N	Y	N	H3-like	221	666	K	K	K	K	A	F	S	A
Potri.002G100100	populus trichocarpa	N	Y	N	H3-like	311	936	K	E	K	K	T	Y	Q	L
Potri.003G208200	populus trichocarpa	N	Y	N	H3-like	70	213	-	-	-	-	-	-	S	A
Potri.003G208800	populus trichocarpa	N	Y	N	H3-like	88	267	-	-	-	-	-	-	S	A
Potri.003G209400	populus trichocarpa	N	Y	N	H3-like	70	213	-	-	-	-	-	-	S	A
Potri.003G209800	populus trichocarpa	N	Y	N	H3-like	125	378	K	K	K	K	A	F	S	-
Potri.005G116700	populus trichocarpa	N	Y	N	H3-like	75	228	-	-	N	K	T	Y	-	-
Potri.005G233900	populus trichocarpa	N	N	N	H3-like	136	411	K	K	K	K	A	F	S	S
Potri.007G096700	populus trichocarpa	N	Y	N	H3-like	90	273	-	-	-	-	-	-	H	L
Potri.T159500	populus trichocarpa	N	Y	N	H3-like	261	786	K	K	K	K	A	F	S	A
171192	Selaginella moellendorffii	N	Y	N	CenH3	126	381	-	-	S	H	Q	F	E	I
176603	Selaginella moellendorffii	N	Y	N	H3.3	136	411	K	K	K	K	T	Y	H	L
269004	Selaginella moellendorffii	N	Y	N	H3.3	136	411	K	K	K	K	T	Y	H	L
103546	Selaginella moellendorffii	N	N	N	H3-like	136	411	K	K	K	K	A	Y	S	M
438193	Selaginella moellendorffii	N	N	N	H3-like	136	411	K	K	K	K	A	Y	S	M
78992	Selaginella moellendorffii	N	N	N	H3-like	136	411	K	K	K	K	A	Y	S	M
Solyc01g095650	solanum lycopersium	N	Y	N	CenH3	144	435	K	S	K	Q	R	Y	E	I
Solyc01g073970	solanum lycopersium	N	N	N	H3.1	136	411	K	K	K	K	A	F	S	A
Solyc01g074000	solanum lycopersium	N	N	N	H3.1	136	411	K	K	K	K	A	F	S	A
Solyc01g079110	solanum lycopersium	N	N	N	H3.1	136	411	K	K	K	K	A	F	S	A
Solyc01g080600	solanum lycopersium	N	N	N	H3.1	136	411	K	K	K	K	A	F	S	A
Solyc01g086820	solanum lycopersium	N	N	N	H3.1	136	411	K	K	K	K	A	F	S	A
Solyc02g077480	solanum lycopersium	N	N	N	H3.1	136	411	K	K	K	K	A	F	S	A
Solyc10g008910	solanum lycopersium	N	N	N	H3.1	136	411	K	K	K	K	A	F	S	A
Solyc12g056540	solanum lycopersium	N	N	N	H3.1	136	411	K	K	K	K	A	F	S	A
Solyc04g081150	solanum lycopersium	Y	Y	N	H3.3	136	411	K	K	K	K	T	Y	H	L
Solyc05g051500	solanum lycopersium	N	Y	N	H3.3	136	411	K	K	K	K	T	Y	H	L
Solyc11g010230	solanum lycopersium	N	Y	N	H3.3	136	411	K	K	K	K	T	Y	H	L
Solyc01g086760	solanum lycopersium	N	N	N	H3-like	93	282	K	K	K	K	T	F	S	T
Solyc01g086800	solanum lycopersium	N	N	N	H3-like	85	258	K	K	K	K	A	F	-	-
Solyc04g049470	solanum lycopersium	N	Y	N	H3-like	83	252	K	K	K	R	A	-	H	A
Solyc04g074580	solanum lycopersium	N	N	N	H3-like	136	411	K	K	K	K	T	Y	H	L
Vocar20005857m	Volvox carteri	N	Y	N	CenH3	98	297	-	-	-	-	-	Y	E	L
Vocar20002453m	Volvox carteri	N	Y	N	H3-like	135	408	K	K	K	K	A	Y	Q	L
Vocar20002597m	Volvox carteri	N	Y	N	H3-like	135	408	K	K	K	K	A	Y	Q	L
Vocar20003601m	Volvox carteri	N	Y	N	H3-like	135	408	K	K	K	K	A	Y	Q	L
Vocar20005447m	Volvox carteri	N	Y	N	H3-like	173	522	K	K	K	K	K	F	D	E
Vocar20010992m	Volvox carteri	N	Y	N	H3-like	135	408	K	K	K	K	A	Y	Q	L
Vocar20011032m	Volvox carteri	N	Y	N	H3-like	135	408	K	K	K	K	A	Y	Q	L
Vocar20014035m	Volvox carteri	N	Y	N	H3-like	135	408	K	K	K	K	A	Y	Q	L
Vocar20014155m	Volvox carteri	N	Y	N	H3-like	135	408	K	K	K	K	A	Y	Q	L
Vocar20014657m	Volvox carteri	N	Y	N	H3-like	135	408	K	K	K	K	A	Y	Q	L
Vocar20014712m	Volvox carteri	N	Y	N	H3-like	135	408	K	K	K	K	A	Y	Q	L
Vocar20014841m	Volvox carteri	N	Y	N	H3-like	135	408	K	K	K	K	A	Y	Q	L
GRMZM2G158526	zea mays	Y	Y	N	CenH3	125	378	A	A	-	K	-	W	E	L
GRMZM2G078314	zea mays	N	N	N	H3.1	136	411	K	K	K	K	A	F	S	A
GRMZM2G130079	zea mays	N	N	Y	H3.1	136	411	K	K	K	K	A	F	S	A
GRMZM2G179005	zea mays	N	N	Y	H3.1	136	411	K	K	K	K	A	F	S	A
GRMZM2G355773	zea mays	N	N	N	H3.1	136	411	K	K	K	K	A	F	S	A
GRMZM2G376957	zea mays	N	N	N	H3.1	136	411	K	K	K	K	A	F	S	A
GRMZM2G401581	zea mays	N	N	N	H3.1	136	411	K	K	K	K	A	F	S	A
GRMZM2G418258	zea mays	N	N	N	H3.1	136	411	K	K	K	K	A	F	S	A
GRMZM2G447984	zea mays	N	N	N	H3.1	169	510	K	K	K	K	A	F	S	A
GRMZM2G475899	zea mays	N	N	N	H3.1	254	783	K	K	K	K	A	F	S	A
GRMZM5G864735	zea mays	N	N	N	H3.1	136	411	K	K	K	K	A	F	S	A
GRMZM2G051879	zea mays	Y	Y	N	H3.3	136	411	K	K	K	K	T	Y	H	L
GRMZM2G118355	zea mays	N	Y	N	H3.3	136	411	K	K	K	K	T	Y	H	L
GRMZM2G145758	zea mays	Y	Y	N	H3.3	136	411	K	K	K	K	T	Y	H	L
GRMZM2G171387	zea mays	N	Y	N	H3.3	136	411	K	K	K	K	T	Y	H	L
GRMZM2G176358	zea mays	Y	Y	N	H3.3	136	411	K	K	K	K	T	Y	H	L
GRMZM2G070444	zea mays	N	Y	N	H3-like	729	2190	K	K	K	K	R	L	D	S
GRMZM2G387076	zea mays	N	N	N	H3-like	136	411	K	K	K	K	A	F	S	S
GRMZM2G451254	zea mays	N	N	N	H3-like	136	411	K	K	K	K	A	F	S	S
